# Supplementary material for: Closing Clostridium botulinum Group I Genomes Using a Combination of Short- and Long-Reads
Source: Front Microbiol. 2020 Feb 19;11:239. doi: 10.3389/fmicb.2020.00239 (PMC7050642; doi:10.3389/fmicb.2020.00239)
Supplement: TABLE S1 — C. botulinum group I genomes used for phylogenetic analysis in this study. [file Table_1.XLSX]

## Sheet: seqsphere_export_2019-05-31-11-
Supplementray Table 1. C. botulinum group I genomes used for phylogenetic analysis in this study.
Sample ID	Collection Date	Country of Isolation	ST	Nucleotide Accession(s)	Sample Accession	Study Accession	PubMed ID(s)	Contigs No.	Genome size (bp)
CDC_67190	2012	USA	4	CP014148.1	SAMN04262350	PRJNA301988		1	4
Hall 183	1922	USA	4	LFOP01	SAMN03779957	PRJNA286797	26939550	99	4
CDC_297	1969	USA	18	CP006907.1	SAMN03222819	PRJNA222587	25489752	1	3.9
83F_hyb	1996	USA	4	NZ_CP031098.1	SAMN03769222	PRJNA224116		1	4
230613	not provided	China	88	NC_017297	SAMN02603020	PRJNA224116		1	4
Kyoto	1978	Japan: Kyoto	2	NC_012563	SAMN02603540	PRJNA224116		1	4.2
ATCC 3502	1950	USA	9	NC_009495	SAMEA1705919	PRJNA61579		1	3.9
ATCC 19397	not provided	USA	1	NC_009697	SAMN02603532	PRJNA224116		1	3.9
83F_Miseq_flex	1996	not provided	4	NA	SAMN03769222	PRJNA243331		118	4
AM1295	not provided	not provided	1	LFPI01	SAMN03779954	PRJNA286797	26939550	34	3.9
Langeland	not provided	not provided	88	NC_009699	SAMN02603533	PRJNA224116		1	4
CDC_69094	not provided	not provided	6	CP013246.1	SAMN04262333	PRJNA301978		1	4.1
NZ_AP014696	1995	Japan	19	NZ_AP014696	SAMD00024166	PRJNA224116		1	3.9
32A	not provided	not provided	unknown	AQPT01	SAMN01940924	PRJNA192664		385	3.8
CDC51232_Miseq_flex	2008	not provided	7	NA	SAMN03769220	PRJNA243331		85	4.1
ATCC 17862	1935	not provided	1	LGIK01	SAMN03787462	PRJNA257008		56	3.9
B2 275	2004	Italy	unknown	AUYX01	SAMN02869850	PRJNA213573	26341861	13	4
McClung 844	not provided	not provided	1	LFOY01	SAMN03779952	PRJNA286797	26939550	48	3.9
NCTC 2916	not provided	not provided	4	ABDO00000000	SAMN02436237	PRJNA20013		49	4
CDC28023	1973	USA	4	JFGM01	SAMN02664941	PRJNA239370	25031122	341	4
Okra	not provided	not provided	34	NC_010516	SAMN02603535	PRJNA224116		1	4
SU0634	1980	Argentina	7	LFQE01	SAMN03779979	PRJNA286797	26939550	43	3.9
ATCC 7949	not provided	not provided	59	LGIL01	SAMN03787463	PRJNA257008		35	3.9
SU0945	1992	Argentina	25	LFRB01	SAMN03779984	PRJNA286797	26939550	272	4.5
IBCA10-7060_Cbot_F/A	2010	USA	87	JSCF01000000	SAMN03114998	PRJNA243331		131	4
CDC 1744	1977	USA	4	LFOK01	SAMN03779956	PRJNA286797	26939550	71	4
657	1977	USA	7	NC_012658	SAMN02603539	PRJNA224116		1	4
1141-11	not provided	USA	unknown	LIIV01	SAMN03998139	PRJNA293156		22	3.9
NZ_CP014148	not provided	not provided	4	NZ_CP014148.1	SAMN04262350	PRJNA224116		1	4
NZ_CP013247	not provided	not provided	28	NZ_CP013247.1	SAMN04262334	PRJNA224116		1	3.9
Hall 80	1918	USA	30	LFOX01	SAMN03779985	PRJNA286797	26939550	65	3.8
Walls 8G	not provided	USA	unknown	LBFH01	SAMN03418622	PRJNA257008		27	4
B2 128	1998	Italy	67	AUYU01	SAMN02869848	PRJNA213565	26341861	10	3.8
SU1937	2009	Argentina	26	LFPN01	SAMN03779962	PRJNA286797	26939550	85	4.3
Prevot Dewping	not provided	not provided	1	LFOV01	SAMN03779950	PRJNA286797	26939550	42	3.9
B2 331	2004	Italy	unknown	AUYV01	SAMN02869845	PRJNA213567	26341861	10	3.8
A2B3 87	1995	Italy: Sicilia	38	AUZB00000000	SAMN02869849	PRJNA213609		13	4.2
301-13	2013	France	unknown	LIIR01	SAMN03996895	PRJNA293087		126	3.9
224-13	2013	France	unknown	LIIP01	SAMN03996597	PRJNA293039		160	4
277-00	2000	Iran	55	JXMY01	SAMN03274242	PRJNA271394	25838479	90	3.9
VPI 7124	not provided	USA	1	LFRD01	SAMN03779946	PRJNA286797	26939550	80	3.9
SU0998	1994	Argentina	2	LFQB01	SAMN03779976	PRJNA286797	26939550	61	4.1
Loch Maree	not provided	not provided	3	NC_010520	SAMN02603536	PRJNA224116		1	4
Bf	not provided	USA	14	ABDP00000000	SAMN02436292	PRJNA20015		70	4.2
H04402 065	2004	UK	unknown	NC_017299	SAMEA2272270	PRJNA224116		1	3.9
Hall	not provided	USA	1	NC_009698	SAMN02603534	PRJNA58931		1	3.8
CDC_53174	not provided	USA	28	CP013247.1	SAMN04262334	PRJNA301979		1	3.9
126-07	2007	Switzerland	47	LIIS01	SAMN03996919	PRJNA293095		43	3.8
SU1306	1998	Argentina	22	LFPO01	SAMN03779981	PRJNA286797	26939550	66	4.3
CDC 795	not provided	USA	98	LFQV01	SAMN03779987	PRJNA286797	26939550	97	3.9
CDC48761	1993	USA	4	JFGG01	SAMN02664949	PRJNA239370	25031122	418	4
ATCC 17843	not provided	not provided	59	LGIH01	SAMN03787459	PRJNA257008		24	3.9
ATCC 25763	not provided	not provided	1	LHUL01	SAMN03862115	PRJNA257008		28	3.9
ATCC 17843 (B5)	not provided	not provided	59	LFOL01	SAMN03779986	PRJNA286797	26939550	79	3.9
An436	not provided	Sweden	14	LFON01	SAMN03779988	PRJNA286797	26939550	70	4.2
ATCC 449	not provided	not provided	1	LFOO01	SAMN03779947	PRJNA286797	26939550	65	3.8
Hall 4834	1931	USA	4	LFOQ01	SAMN03779958	PRJNA286797	26939550	86	4
Hall 8857Ab	1935	USA	4	LFOS01	SAMN03779960	PRJNA286797	26939550	84	4
KF Meyer 126	1921	USA	19	LFOT01	SAMN03779948	PRJNA286797	26939550	55	3.9
Hall 8388A	1935	USA	4	LFOR01	SAMN03779959	PRJNA286797	26939550	55	3.9
Prevot 910	1953	France	1	LFOU01	SAMN03779949	PRJNA286797	26939550	74	3.9
Prevot 697B	1952	Sweden	1	LFOW01	SAMN03779951	PRJNA286797	26939550	34	3.8
A2 117	1996	Italy	unknown	AUYW01	SAMN02869852	PRJNA213371	26341861	11	3.8
B2 267	2003	Italy	unknown	AUYY01	SAMN02869846	PRJNA213576	26341861	12	3.9
KF Meyer 33	1920	USA	1	LFOZ01	SAMN03779953	PRJNA286797	26939550	98	3.9
Mauritius	not provided	Mauritius	28	LFPL01	SAMN03779961	PRJNA286797	26939550	84	3.9
SU1575NT	1999	Argentina	unknown	LFPP01	SAMN03780006	PRJNA286797	26939550	38	3.9
SU1259	1996	Argentina	2	LFQY01	SAMN03779968	PRJNA286797	26939550	174	4.2
SU1891	2007	Argentina	2	LFQZ01	SAMN03779969	PRJNA286797	26939550	223	4.1
SU1934	2010	Argentina	26	LFPU01	SAMN03779967	PRJNA286797	26939550	38	4
SU0729	1987	Argentina	7	LFQF01	SAMN03779955	PRJNA286797	26939550	72	3.9
SU1304	1998	Argentina	22	LFPV01	SAMN03779982	PRJNA286797	26939550	141	4.3
SU1169	1998	Argentina	25	LFRA01	SAMN03779983	PRJNA286797	26939550	204	4.5
SU1054	1998	Argentina	2	LFPW01	SAMN03779970	PRJNA286797	26939550	99	4.3
SU1072	1998	Argentina	2	LFPX01	SAMN03779971	PRJNA286797	26939550	66	4.3
SU1064	1998	Argentina	2	LFPY01	SAMN03779972	PRJNA286797	26939550	139	4.4
SU1074	1998	Argentina	2	LFPZ01	SAMN03779973	PRJNA286797	26939550	61	4.1
SU0807	1987	Argentina	2	LFQC01	SAMN03779977	PRJNA286797	26939550	68	4.1
SU1112	1995	Argentina	26	LFQA01	SAMN03779974	PRJNA286797	26939550	46	3.9
SU0801	2010	Argentina	2	LFRC01	SAMN03779975	PRJNA286797	26939550	124	4.2
SU1917	2009	Argentina	2	LFPR01	SAMN03779964	PRJNA286797	26939550	61	4.3
SU0994	1994	Argentina	2	LFQD01	SAMN03779978	PRJNA286797	26939550	51	4.3
SU1274	1997	Argentina	2	LFPQ01	SAMN03779963	PRJNA286797	26939550	50	4.2
B2 433	2009	Italy	unknown	AUYZ01	SAMN02869847	PRJNA213581	26341861	12	4.1
A2B7 92	1993	Italy	unknown	AUZA01	SAMN02869851	PRJNA213606	26341861	14	4.1
429-13	2013	France	unknown	LIIQ01	SAMN03996885	PRJNA293085		148	4
SU1275	1997	Argentina	2	LFPT01	SAMN03779966	PRJNA286797	26939550	280	4.3
F 357	2005	Italy	unknown	AUZC01	SAMN02869844	PRJNA213614	26341861	15	3.8
SU0635W	not provided	Argentina	unknown	LFQG01	SAMN03779980	PRJNA286797	26939550	137	3.9
NZ_CP013242	not provided	not provided	96	NZ_CP013242.1	SAMN04262346	PRJNA224116		1	4.1
NZ_CP013841	not provided	Australia	85	NZ_CP013841.1	SAMN04263496	PRJNA224116		1	3.9
NZ_CP013243	not provided	not provided	unknown	NZ_CP013243.1	SAMN04262345	PRJNA224116		1	4.4
NZ_CP013845	not provided	Argentina	7	NZ_CP013845.1	SAMN04263501	PRJNA224116		1	3.9
NZ_CP013701	not provided	Australia	unknown	NZ_CP013701.1	SAMN04263495	PRJNA224116		1	4.1
NZ_CP013246	not provided	not provided	6	NZ_CP013246.1	SAMN04262333	PRJNA224116		1	4.1
NZ_CP013847	not provided	Argentina	2	NZ_CP013847.1	SAMN04263497	PRJNA224116		1	4.1
NZ_CP013850	not provided	Argentina	92	NZ_CP013850.1	SAMN04263491	PRJNA224116		1	4.1
NZ_CP014174	not provided	Argentina	92	NZ_CP014174.1	SAMN04263507	PRJNA224116		1	4
NZ_CP014219	not provided	Argentina	92	NZ_CP014219.1	SAMN04263506	PRJNA224116		1	4
NZ_CP014151	not provided	Argentina	unknown	NZ_CP014151.1	SAMN04263502	PRJNA224116		1	3.9
NZ_CP013849	not provided	Mauritius	28	NZ_CP013849.1	SAMN04263490	PRJNA224116		1	3.9
CDC_1632	not provided	not provided	unknown	CP013243.1	SAMN04262345	PRJNA301982		1	4.4
CDC_1436	1977	USA	7	NZ_CP006908.1	SAMN03222820	PRJNA224116	25489752	1	4.4
SU1887	2007	Argentina	26	LFPS01	SAMN03779965	PRJNA286797	26939550	67	4
1430-11	2011	France	unknown	LIIW01	SAMN03998142	PRJNA293158		106	4
NZ_CP028859	not provided	USA	1	NZ_CP028859.1	SAMN07135561	PRJNA224116		1	3.9
CDC_69096	not provided	not provided	18	CP013857.1	SAMN04262347	PRJNA301985		1	4
NZ_CP028842	2015	USA	1	NZ_CP028842.1	SAMN03780372	PRJNA224116		1	3.9
NZ_CP013843	not provided	Argentina	unknown	NZ_CP013843.1	SAMN04263498	PRJNA224116		1	3.9
CDC51232_hyb	2008	not provided	7	NZ_CP031097.1	SAMN03769220	PRJNA224116		1	3.9
69A	1969	USA:CA	1	AQPV01	SAMN01940926	PRJNA192666		72	3.7
